# Supplementary material for: Droplet digital PCR is a powerful technique to demonstrate frequent FGFR1 duplication in dysembryoplastic neuroepithelial tumors
Source: PubMed Central journal article supplement (PMC5356784; doi:10.18632/oncotarget.12881), 2016-10-25
Supplement: oncotarget-08-2104-s001.pdf [file oncotarget-08-2104-s001.pdf]

# Droplet digital PCR is a powerful technique to demonstrate frequent *FGFR1* duplication in dysembryoplastic neuroepithelial tumors

## Supplementary Materials

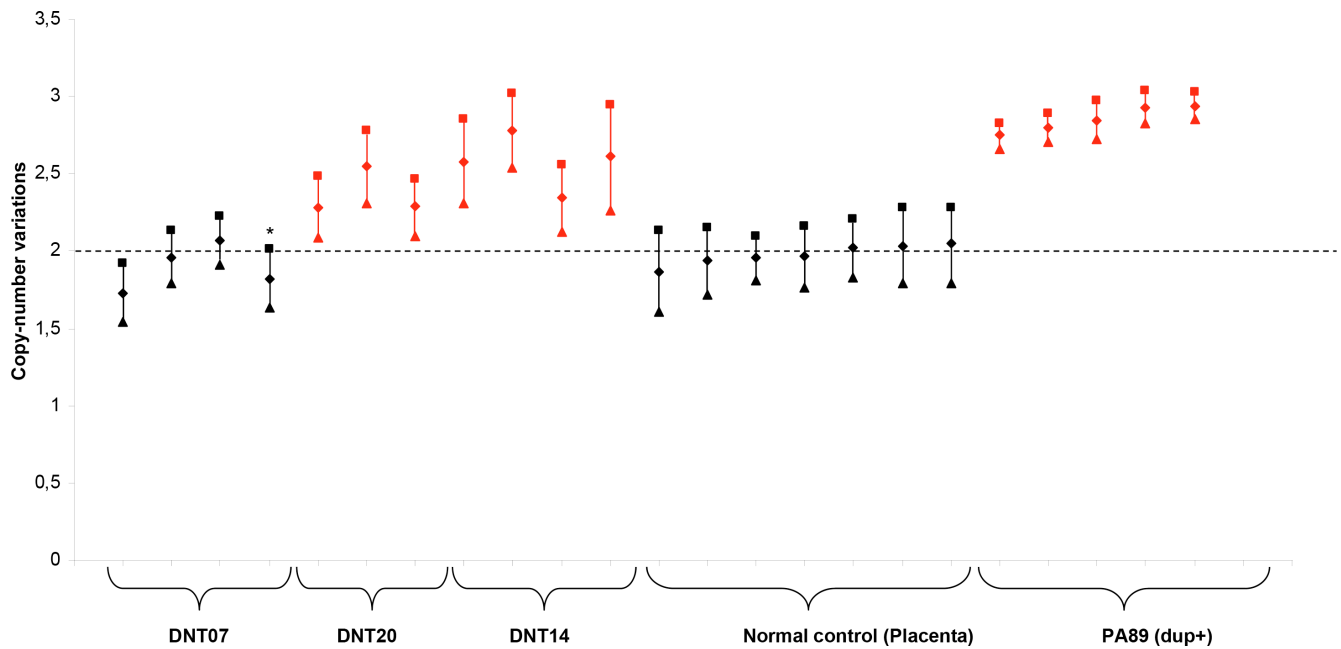

Supplementary Figure S1: DDPCR™ inter-assays reproducibility.

Supplementary Table S1: Details of DDPCR™ results and CNV calculation for all cases (FFPE tissues and \*frozen tissues) to determine *FGFR1* duplication status. See Supplementary\_Table\_S1.
